# Supplementary material for: Chiral mono- and dicarbamates derived from ethyl (S)-lactate: convenient chiral solvating agents for the direct and efficient enantiodiscrimination of amino acid derivatives by 1H NMR spectroscopy
Source: Royal Society of Chemistry journal article supplement (doi:10.1039/d0ra00200c), 2020-01-01
Supplement: d0ra00200c1.pdf [file d0ra00200c1.pdf]

## Supplementary Information

### Chiral Mono- and Dicarbamates Derived from (*S*)-Ethyl Lactate: Convenient Chiral Solvating Agents for the Direct and Efficient Enantiodiscrimination of Amino Acids Derivatives by $^1\text{H}$ NMR Spectroscopy

Federica Balzano and Gloria Uccello-Barretta

Department of Chemistry and Industrial Chemistry, University of Pisa, via Moruzzi 13, 56124 Pisa, Italy

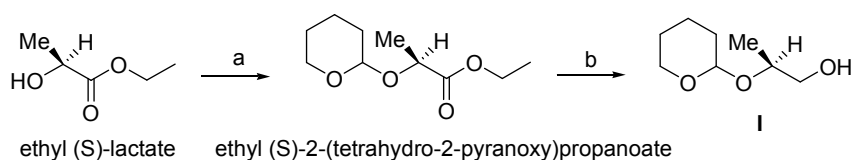

**Scheme S1.** Synthesis of **1**:<sup>21</sup> a) dihydropyran, HCl (12 N), RT, 16 h; b)  $\text{LiAlH}_4$ ,  $\text{Et}_2\text{O}$ , 0 °C.

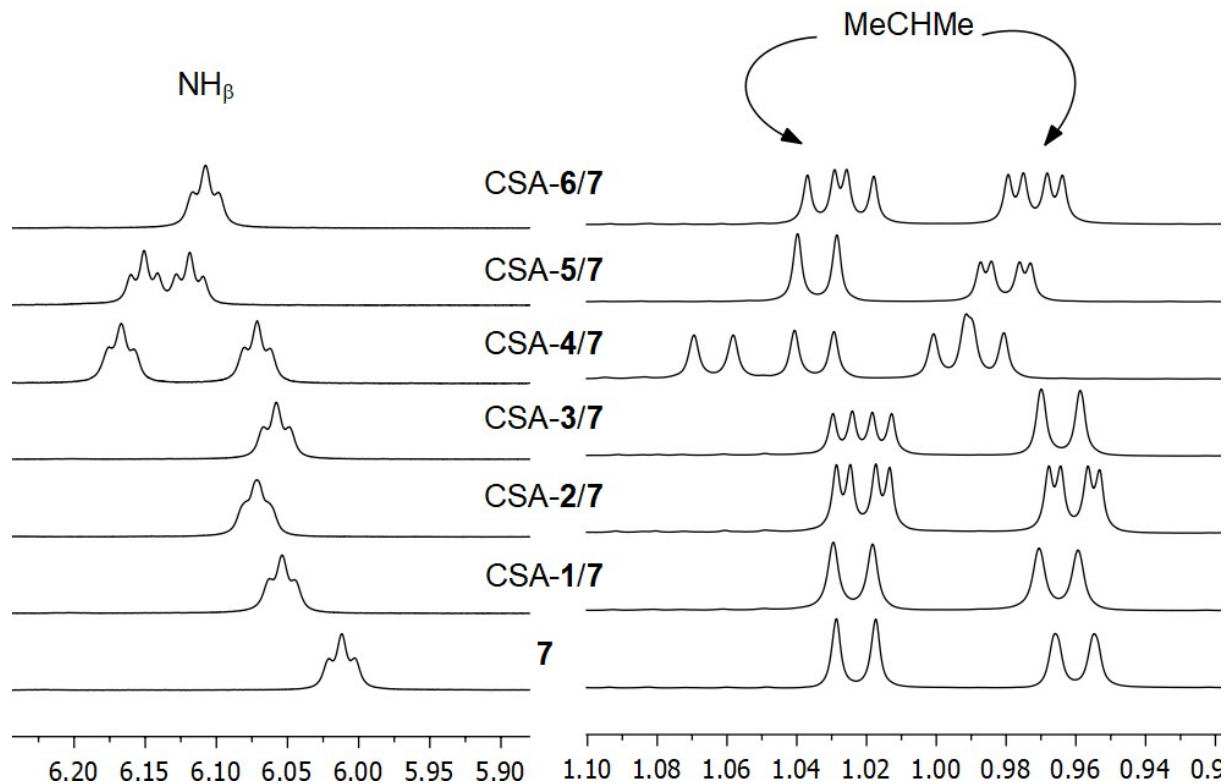

**Figure S1.**  $^1\text{H}$  NMR (600 MHz,  $\text{CDCl}_3$ , 25 °C) spectral regions corresponding to  $\text{NH}_\beta$  and methyl protons of **7** (10 mM) in the presence of one equivalent of CSA

**Table S1.**  $^1\text{H}$  NMR (600 MHz,  $\text{CDCl}_3$ , 25 °C) non-equivalences ( $\Delta\Delta\delta = |\Delta\delta_S - \Delta\delta_R|$ , ppm) data of **7** (30 mM) in the presence of one equivalent of CSA (30 mM)

| substrate | proton                    | CSA-1 | CSA-2 | CSA-3 | CSA-4 | CSA-5 | CSA-6 |
|-----------|---------------------------|-------|-------|-------|-------|-------|-------|
| <b>7</b>  | $\text{NH}_\alpha$        | 0.006 | 0.034 | 0.021 | 0.200 | 0.073 | 0.016 |
|           | $\text{NH}_\beta$         | -     | 0.005 | -     | 0.101 | 0.039 | -     |
|           | $\text{CH}^*$             | 0.002 | 0.006 | 0.004 | 0.036 | 0.015 | 0.004 |
|           | $\text{H}_{\text{ortho}}$ | -     | 0.010 | 0.004 | 0.029 | -     | -     |
|           | $\text{H}_{\text{para}}$  | 0.004 | 0.004 | 0.003 | 0.067 | 0.021 | 0.003 |

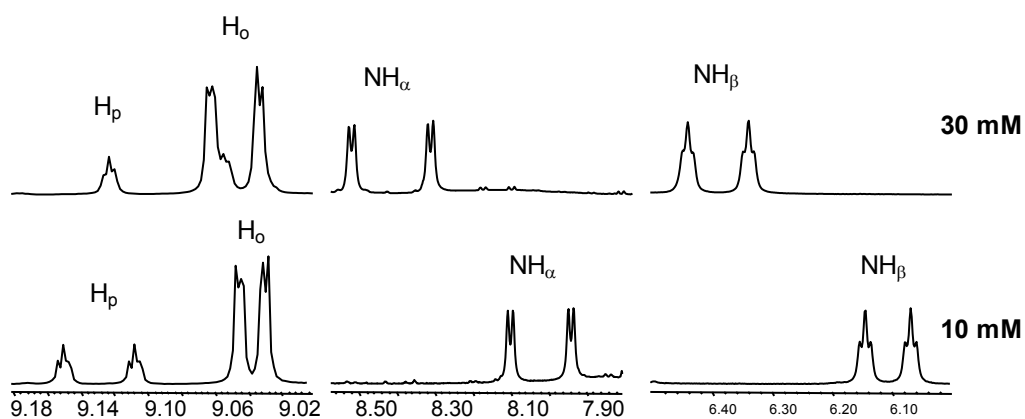

**Figure S2.**  $^1\text{H}$  NMR (600 MHz,  $\text{CDCl}_3$ , 25 °C) spectral regions corresponding to DNB protons and amide ( $\text{NH}_\alpha$  and  $\text{NH}_\beta$ ) protons of **7** (10 mM and 30 mM) in the presence of one equivalent of CSA

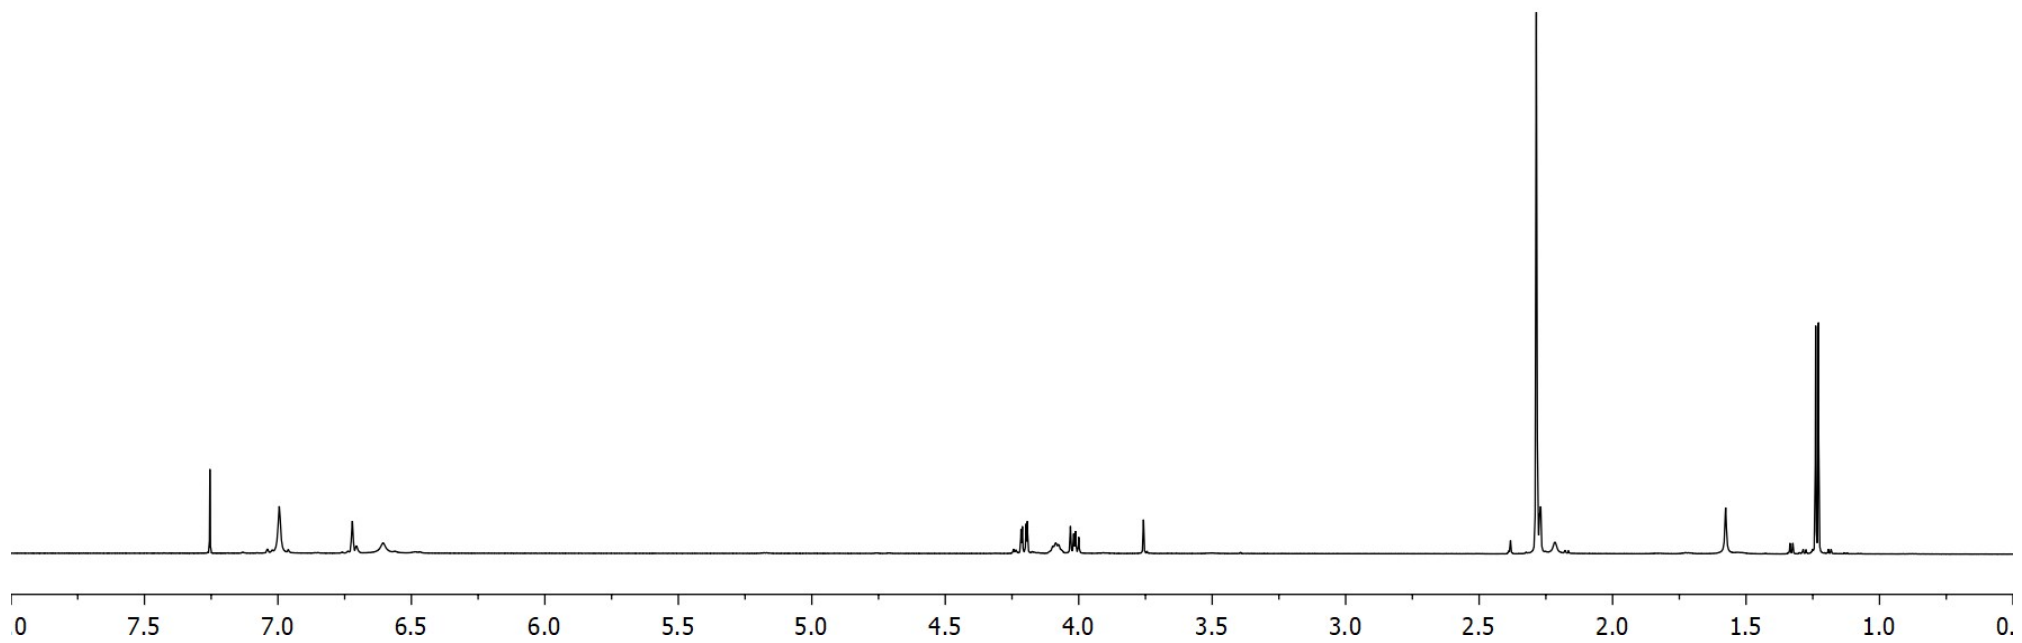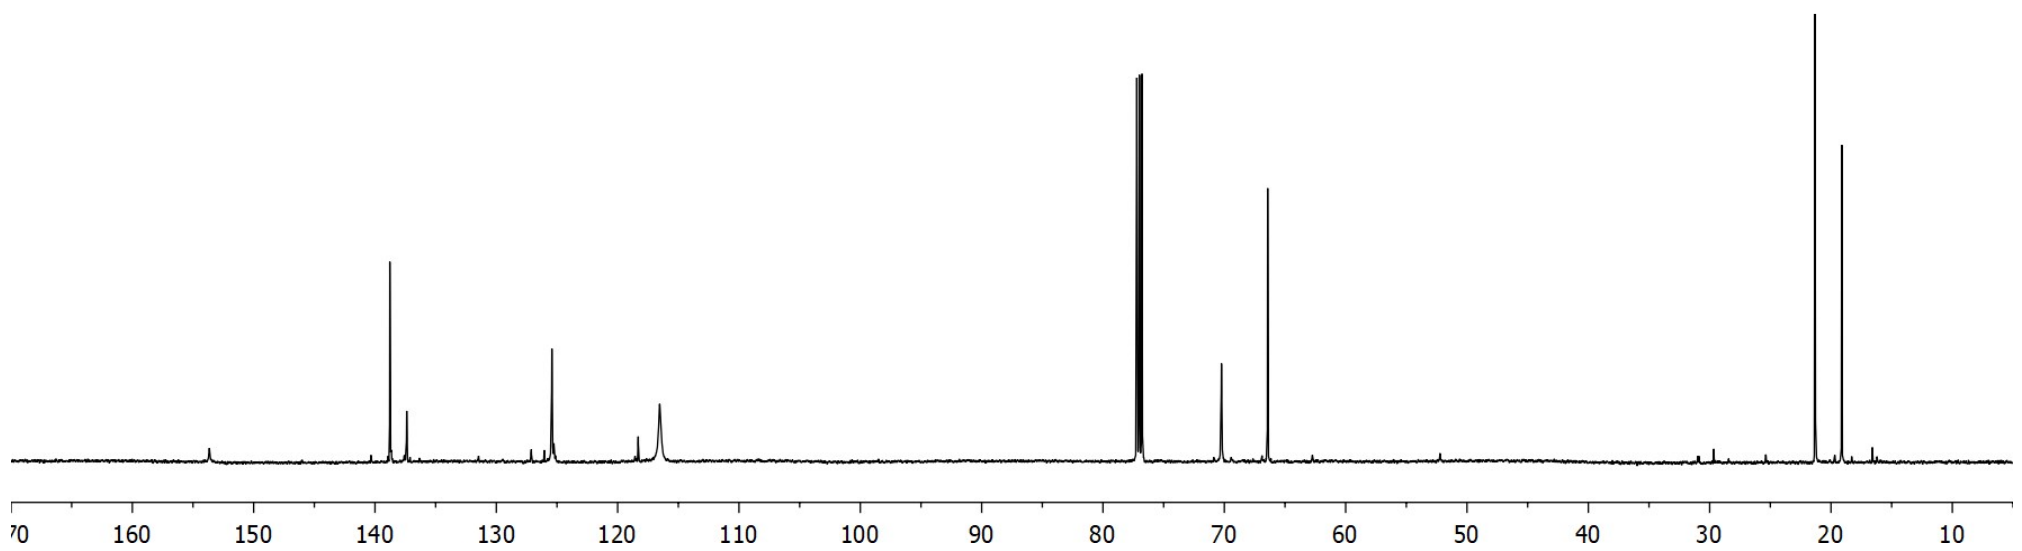

**Figure S3.**  $^1\text{H}$  (600 MHz,  $\text{CDCl}_3$ , 25 °C) and  $^{13}\text{C}$  (150 MHz,  $\text{CDCl}_3$ , 25 °C) NMR spectra of CSA-1

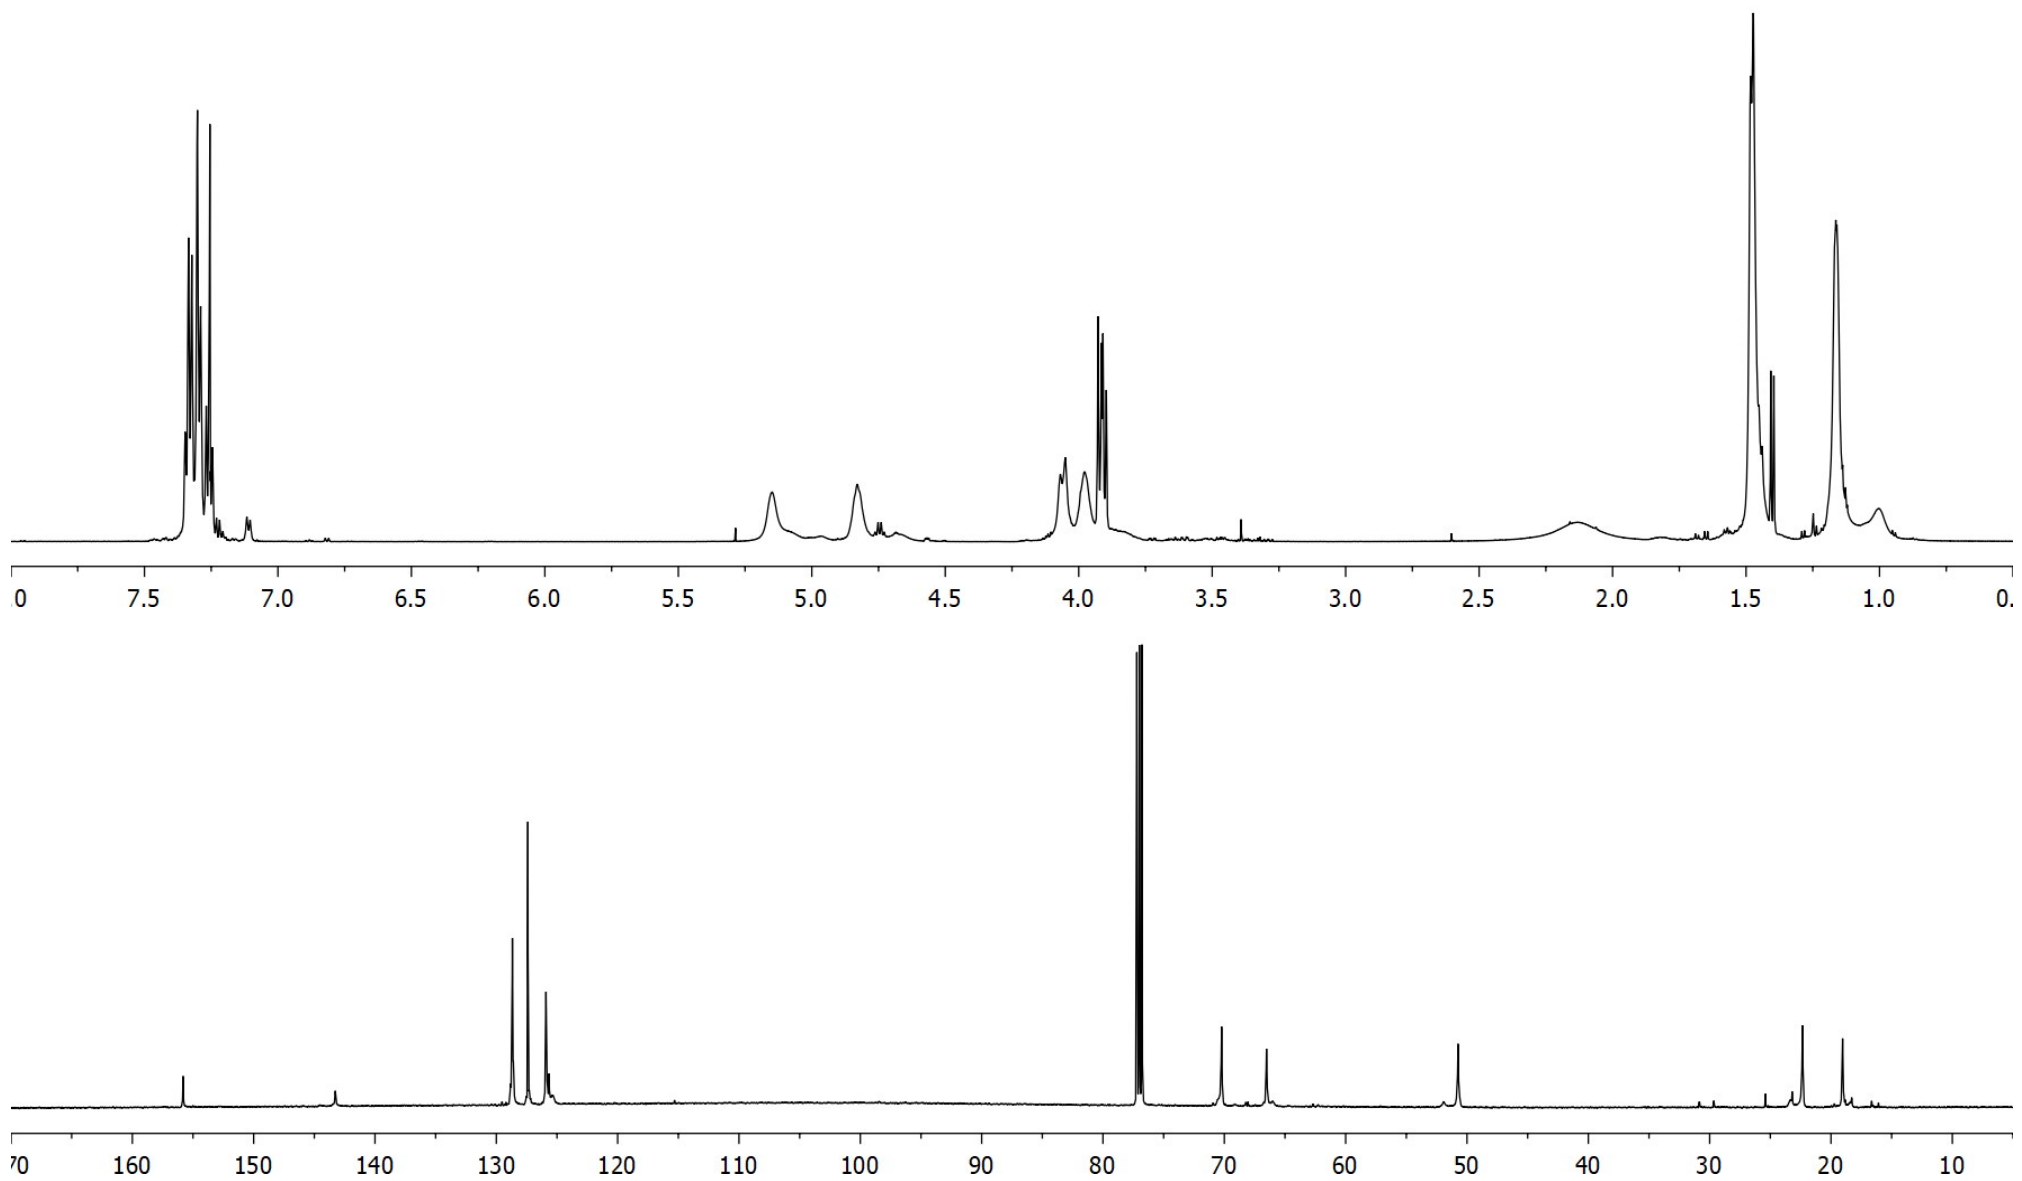

**Figure S4.**  $^1\text{H}$  (600 MHz,  $\text{CDCl}_3$ , 25 °C) and  $^{13}\text{C}$  (150 MHz,  $\text{CDCl}_3$ , 25 °C) NMR spectra of CSA-2

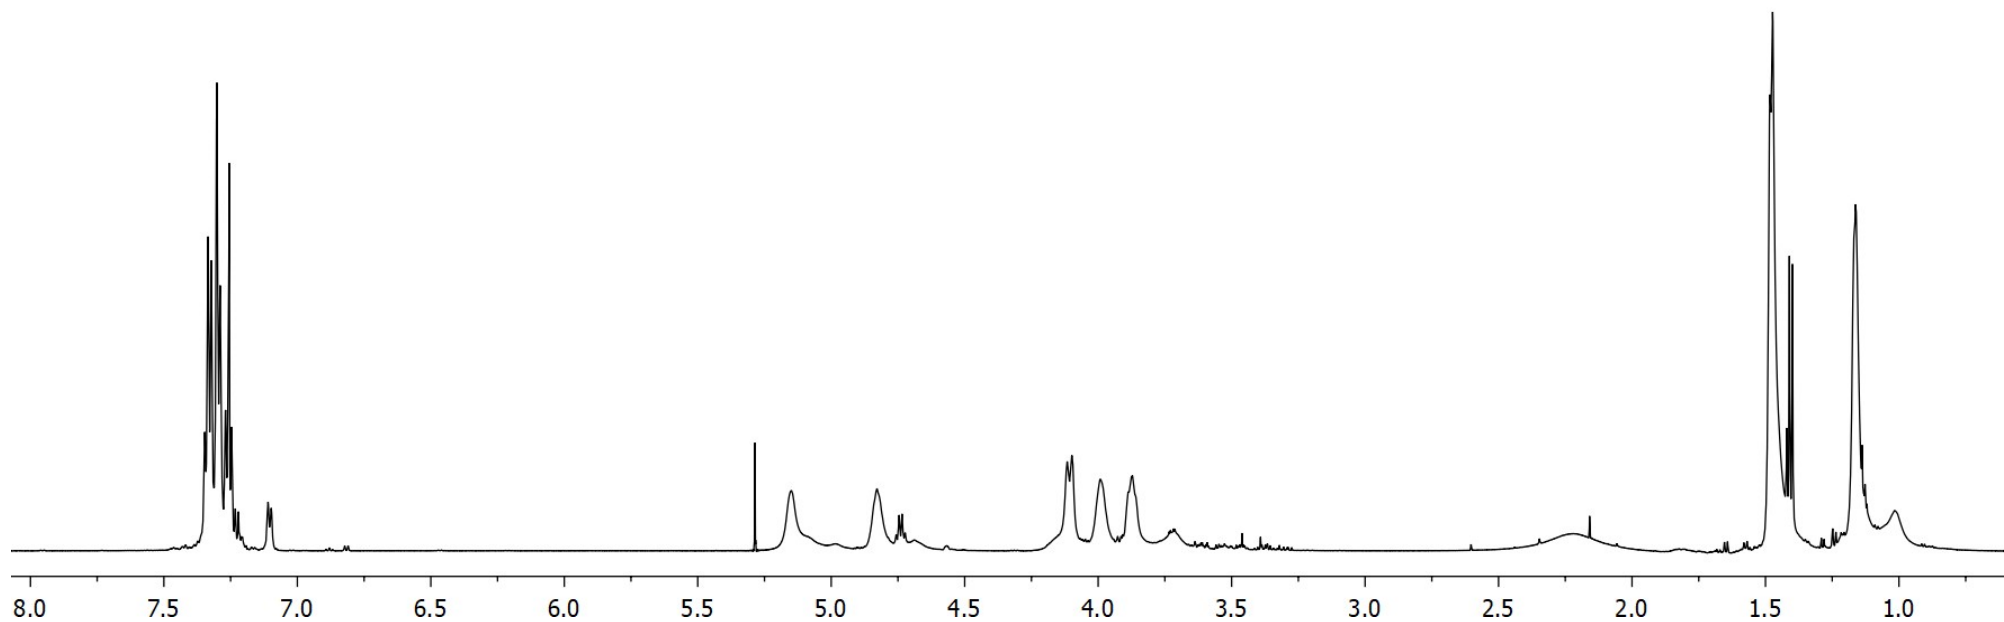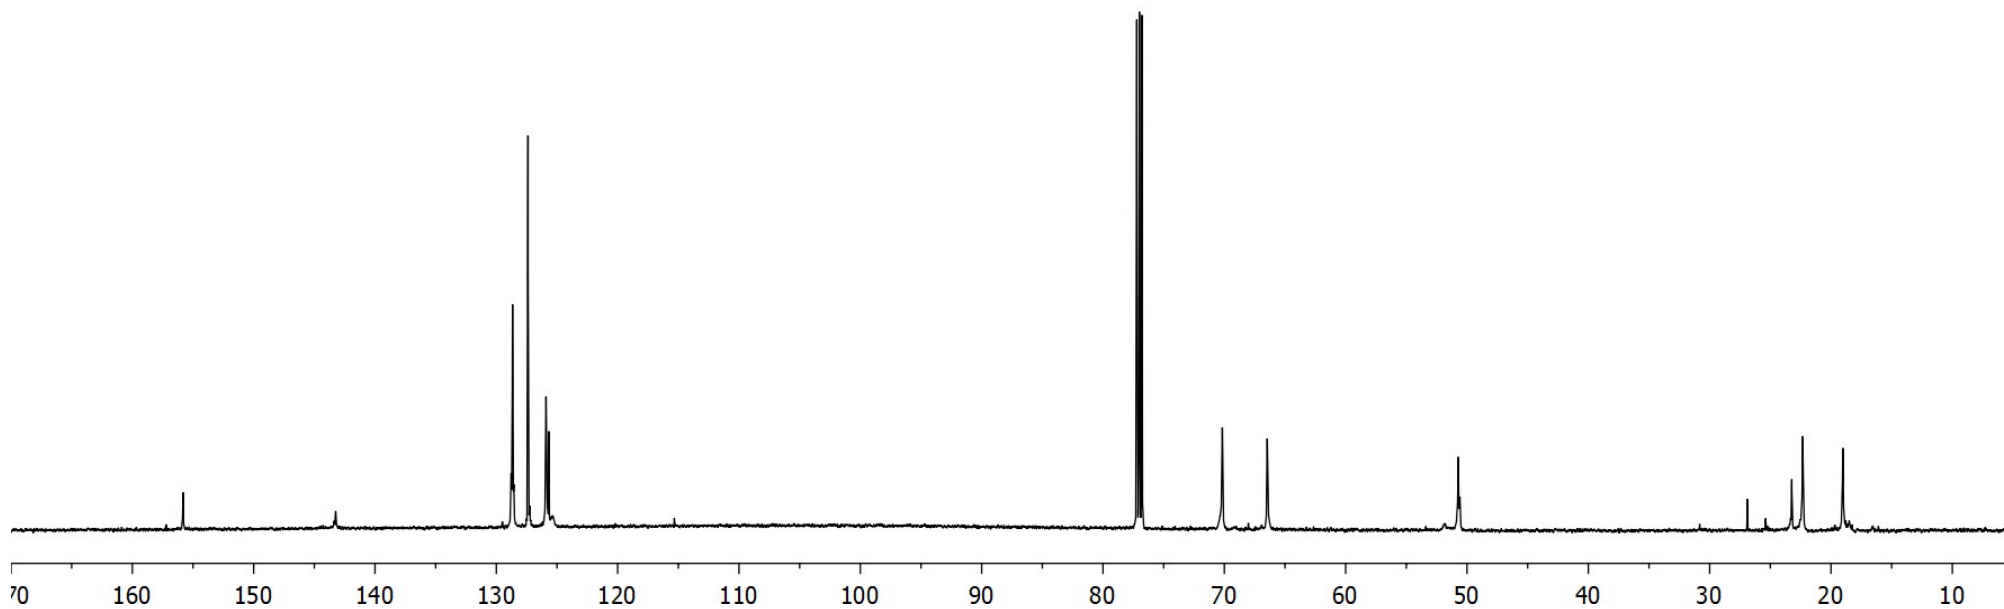

**Figure S5.**  $^1\text{H}$  (600 MHz,  $\text{CDCl}_3$ , 25 °C) and  $^{13}\text{C}$  (150 MHz,  $\text{CDCl}_3$ , 25 °C) NMR spectra of CSA-3

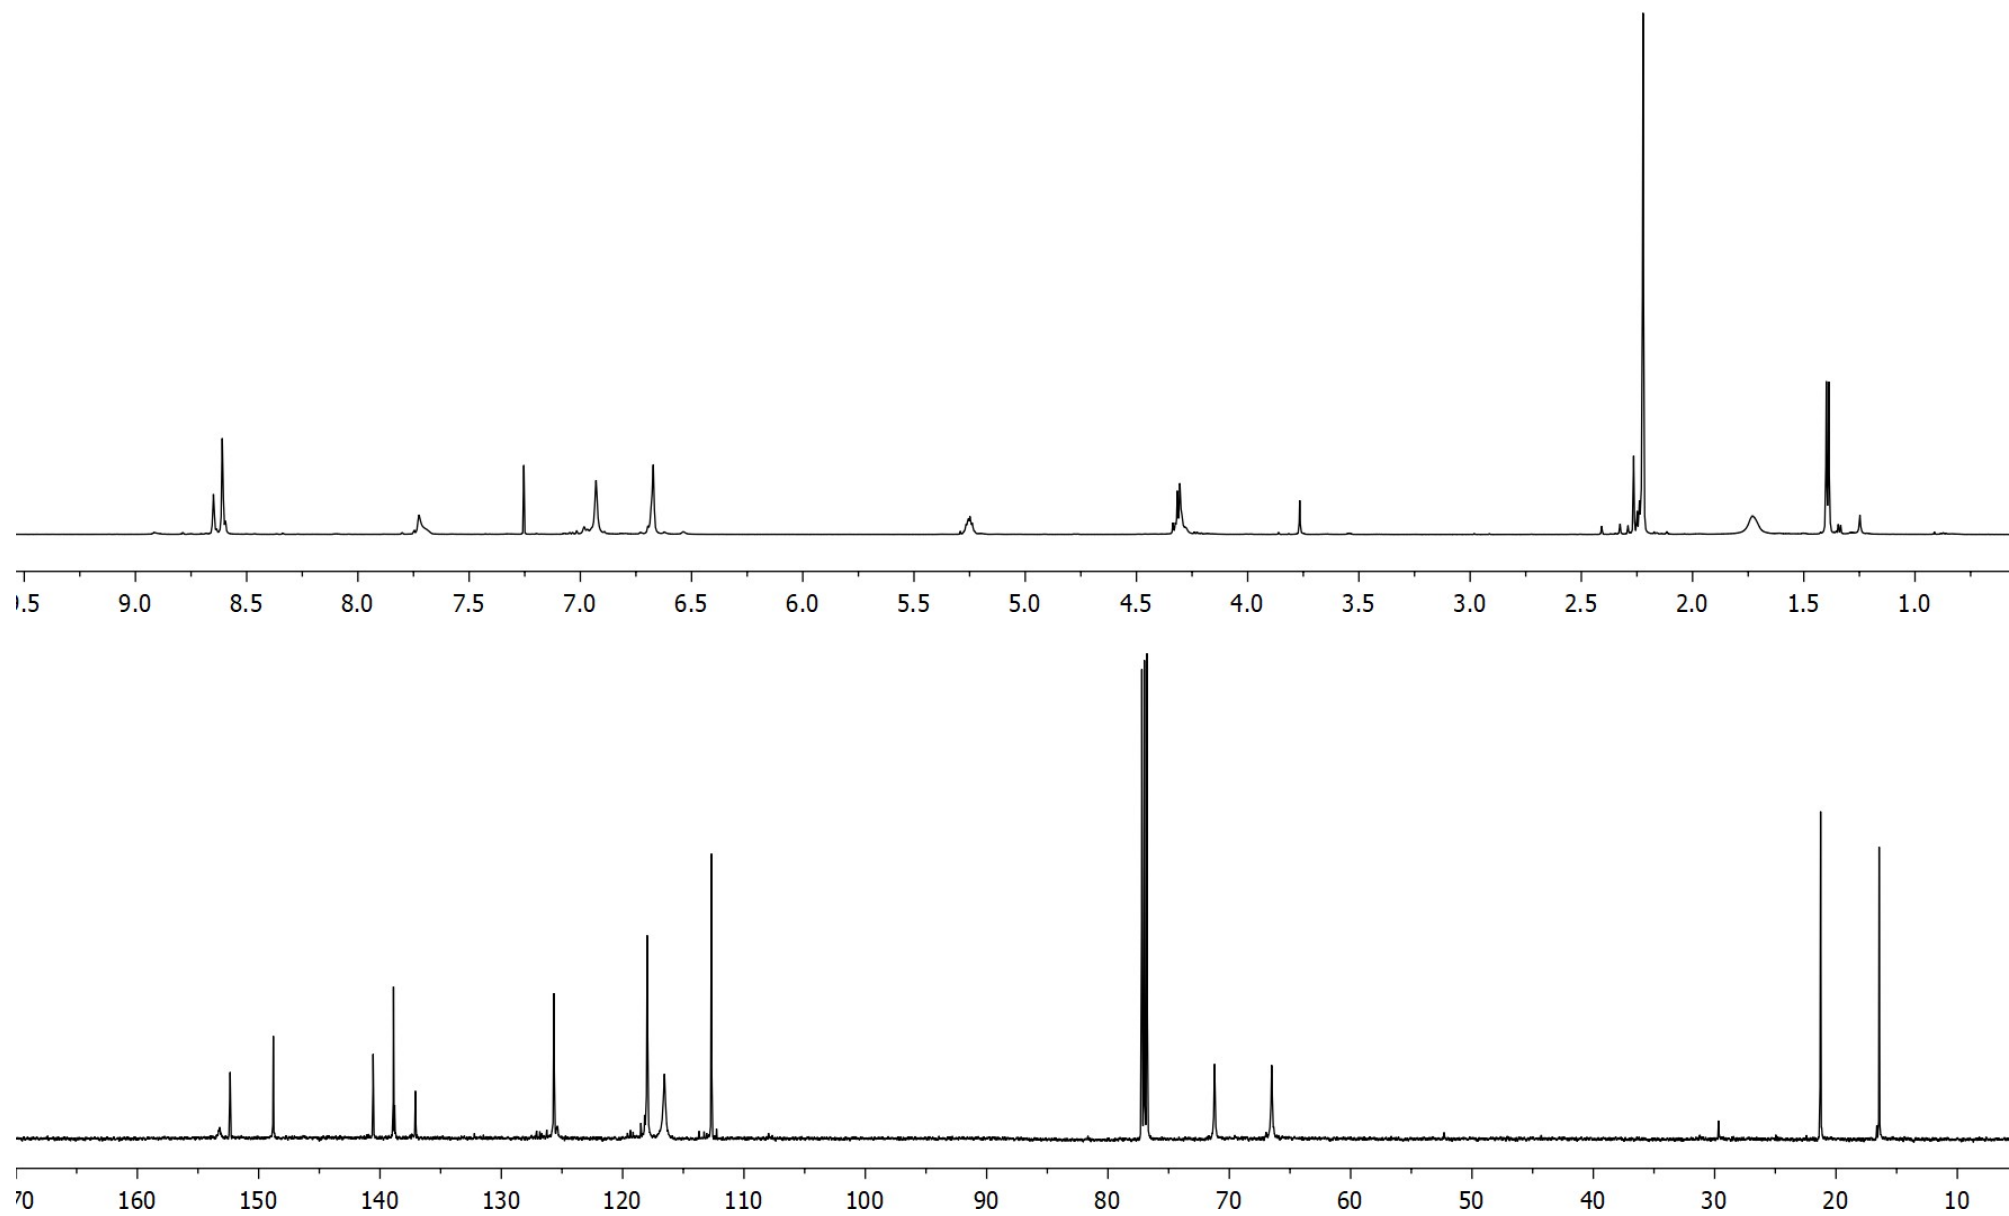

**Figure S6.**  $^1\text{H}$  (600 MHz,  $\text{CDCl}_3$ , 25 °C) and  $^{13}\text{C}$  (150 MHz,  $\text{CDCl}_3$ , 25 °C) NMR spectra of CSA-4

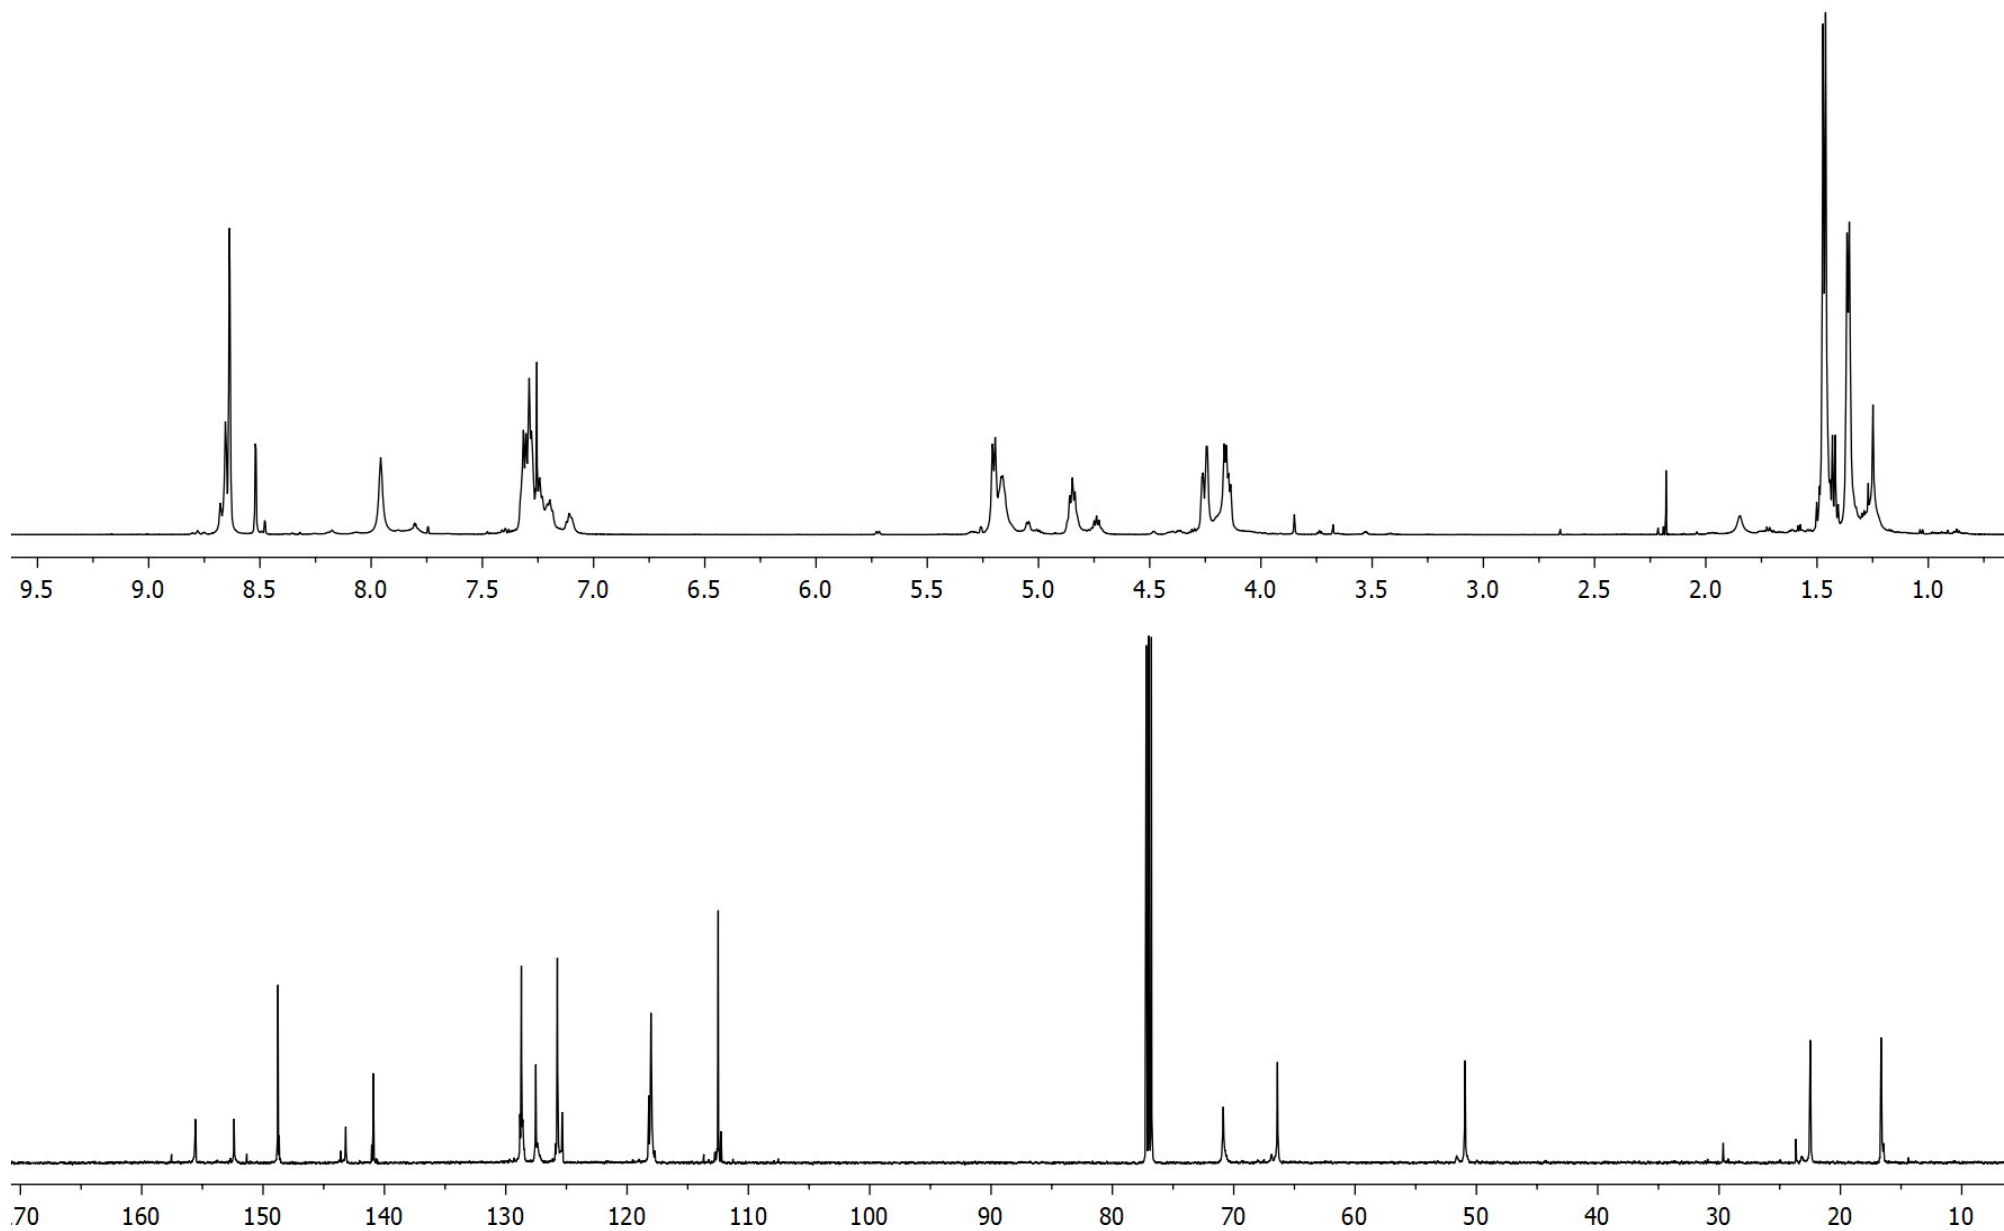

**Figure S7.**  $^1\text{H}$  (600 MHz,  $\text{CDCl}_3$ , 25 °C) and  $^{13}\text{C}$  (150 MHz,  $\text{CDCl}_3$ , 25 °C) NMR spectra of CSA-5

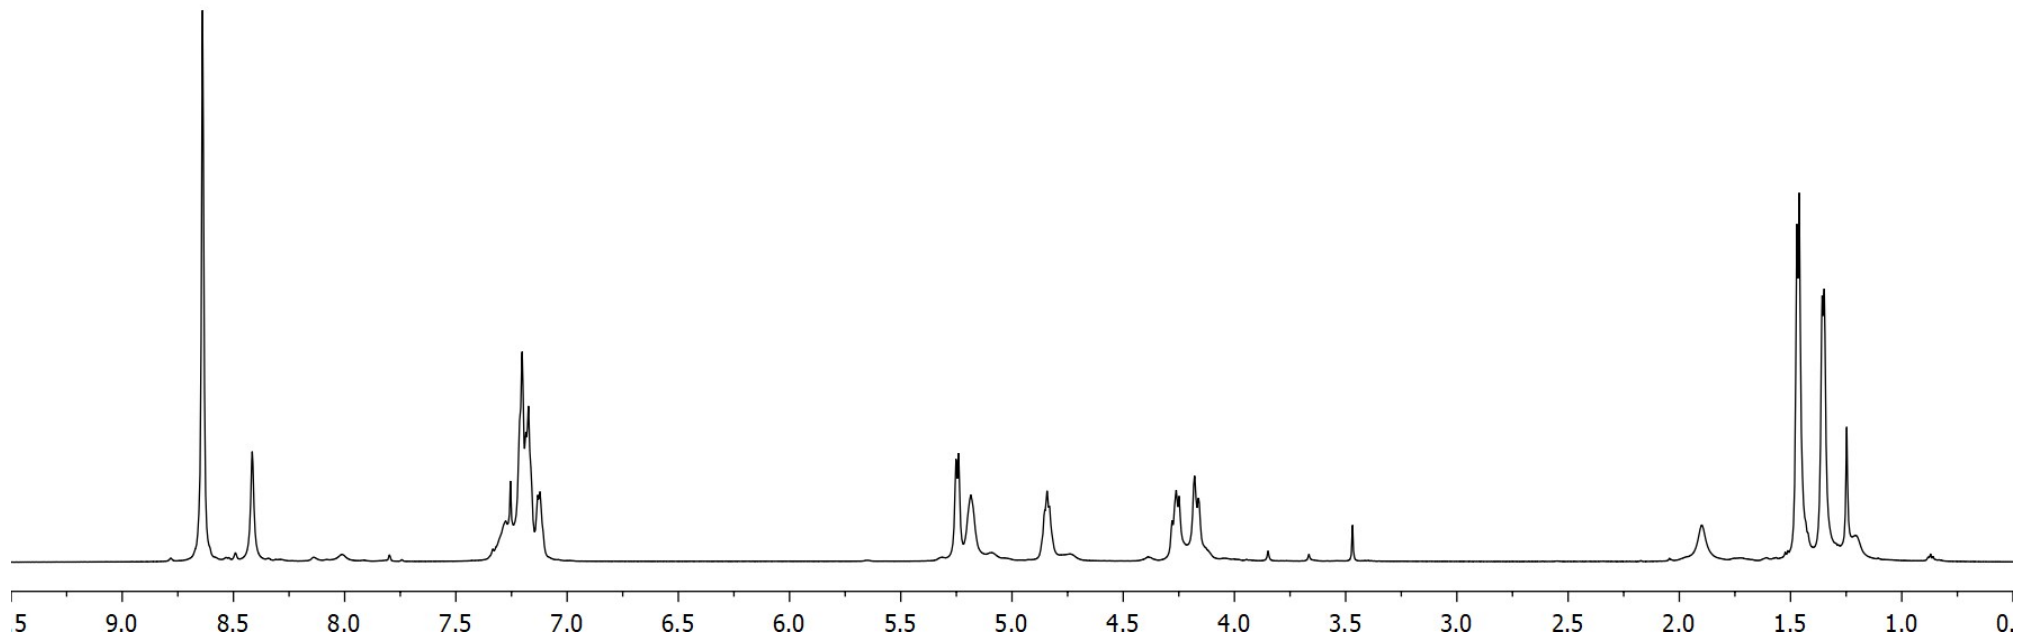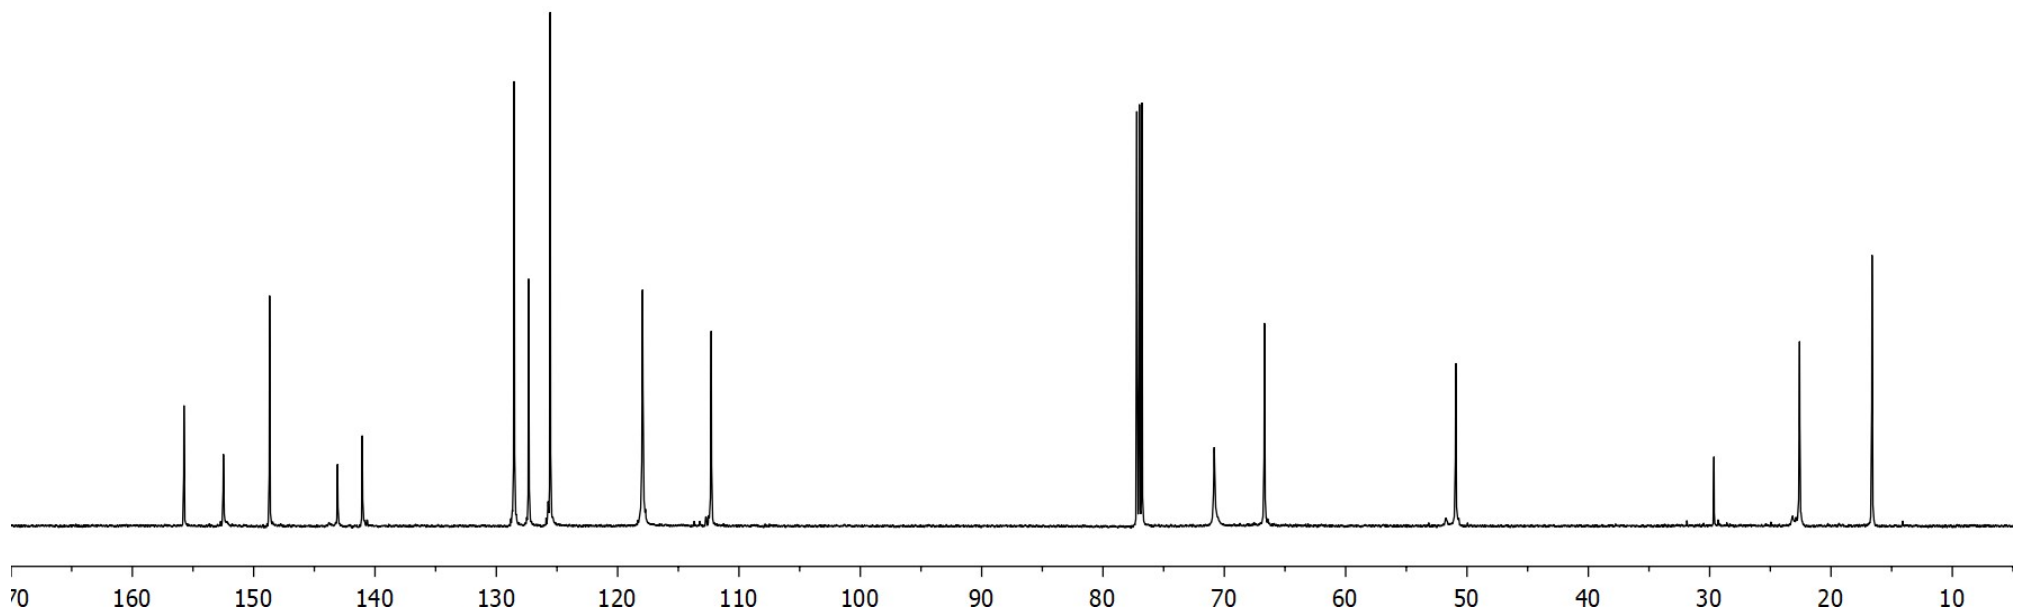

**Figure S8.**  $^1\text{H}$  (600 MHz,  $\text{CDCl}_3$ , 25 °C) and  $^{13}\text{C}$  (150 MHz,  $\text{CDCl}_3$ , 25 °C) NMR spectra of CSA-6
